# Supplementary material
Source: ML conference proceedings conference paper supplement (https://openreview.net/forum?id=Wp4Hkaz2Xe)
Supplement: supplementary_material [file attachment]

Anonymous Authors

for all frequencies  $h$ .

## B DATASET DESCRIPTIONS

In this paper, we conducted tests using eight real-world datasets. These datasets include:

- ETT contains two sub-datasets: ETT1 and ETT2, collected from two electricity transformers at two stations. Each of them has two versions in different resolutions (15 minutes and 1h). ETT dataset contains multiple series of loads and one series of oil temperatures.
- Weather covers 21 meteorological variables recorded at 10-minute intervals throughout the year 2020. The data was collected by the Max Planck Institute for Biogeochemistry's Weather Station, providing valuable meteorological insights.
- Exchange-rate, which contains daily exchange rate data spanning from 1990 to 2016 for eight countries. It offers information on the currency exchange rates across different time periods.
- ECL contains the electricity consumption of 370 clients for short-term forecasting while it contains the electricity consumption of 321 clients for long-term forecasting. It is collected since 01/01/2011. The data sampling interval is every 15 minutes.
- Solar-Energy is about the solar power collected by the National Renewable Energy Laboratory. We choose the power plant data points in Florida as the data set which contains 593 points. The data is collected from 01/01/2006 to 31/12/2016 with the sampling interval of every 1 hour.

We follow the same data processing and train-validation-test set split protocol used in iTransformer, where the train, validation, and test datasets are strictly divided according to chronological order to make sure there are no data leakage issues. As for the forecasting settings, the lookback length is set to 96, while their prediction length varies in {96, 192, 336, 720}. The details of the datasets are provided in Table 1.

## C INFLUENCE OF DYNAMIC FUSION

We conduct an ablation study to investigate the influence of dynamic fusion. We replace the learnable weight vector with a fixed weight vector and name this modified model FreSF. Predictions are carried out on the ETT(ETTh1, ETTh2, ETTm1, ETTm2), Weather, and Exchange-rate datasets. We visualize the prediction results (with a prediction length  $S = 96$ ) for both FreSF and FreDF in Figure 1. In the ETTh1 and ETTm1 datasets, static fusion manages to capture the overall trends and detailed shifts, but the predicted values deviate significantly from the actual figures. This issue can be effectively addressed by employing dynamic fusion. Similarly, in the ETTh2 and ETTm2 datasets, static fusion's predictions are not quite accurate at the extreme points, a problem that dynamic fusion can effectively solve. Likewise, when dynamic fusion is applied to the Weather and Exchange-rate datasets, the prediction curve aligns more closely with the ground truth.

## D ABLATION ON THE INFLUENCE OF OPERATION SEQUENCE

We conduct an ablation study about the influence of operation sequence. Our model initially conducts an inverse fast Fourier

transform(iFFT) on the spectrum  $\mathcal{M}_{out}^{l,m}$  obtained from the transfer function for each frequency  $\mathcal{M}_{in}^{l,m}$ . We then dynamically fusion the predicted results  $Z^{l,m}$  for each frequency. In this section, we first dynamically fuse the spectrums  $\mathcal{M}_{out}^{l,m}$  obtained from the transfer function for each frequency, followed by an iFFT on the result of this fusion. We present the result in Table 3

## E ABLATION ON THE INFLUENCE OF FDBLOCK NUMBER: $L$

To further figure out the impact of different numbers of FDBlock, we perform experiments with three different  $L$  ranging from 1 to 3. As shown in Table 4. And  $L = 1$  is a generally good choice.

## F MOTIVATION EXPERIMENTS

We present the full results of motivation experiments in Table 2. After eliminating low-frequency, we observe enhanced accuracy in the ETTm2 and ETTh2 datasets. Similarly, eliminating mid-frequency signals led to improved results in the ETTh2 and Exchange-rate datasets. The elimination of high-frequency results in more precise results in ETTh1, ETTm2, ETTh1, ETTh2, Exchange-rate, and weather datasets. The most significant improvement is seen when eliminating high-frequency signals. Nevertheless, removing low-frequency and mid-frequency signals can also improve prediction performance on some datasets.

## G LOOKBACK WINDOW: MODERNTCN VS US

At the 2024 International Conference on Learning Representations (ICLR), a groundbreaking approach, ModernTCN, was presented for time series forecasting. However, it's worth mentioning that the lookback window length used in their study consistently surpasses 96. In our case, all experiments utilize a lookback window length of 96, which makes a direct comparison not feasible.

**Table 1: Detailed dataset descriptions.** *Dim* denotes the variate number of each data set. *Dataset Size* denotes the total number of time points in (Train, Validation, Test) split, respectively. *Prediction Length* denotes the future time points to be predicted, and four prediction settings are included in each data set. *Frequency* denotes the sampling interval of time points.

| Dataset      | Dim | Prediction Length   | Dataset Size          | Frequency | Information |
|--------------|-----|---------------------|-----------------------|-----------|-------------|
| ETTh1,ETTh2  | 7   | {96, 192, 336, 720} | (8545, 2881, 2881)    | Hourly    | Electricity |
| ETTm1,ETTm2  | 7   | {96, 192, 336, 720} | (34465, 11521, 11521) | 15min     | Electricity |
| Exchange     | 8   | {96, 192, 336, 720} | (5120, 665, 1422)     | Daily     | Economy     |
| Weather      | 21  | {96, 192, 336, 720} | (36792, 5271, 10540)  | 10min     | Weather     |
| ECL          | 321 | {96, 192, 336, 720} | (18317, 2633, 5261)   | Hourly    | Electricity |
| Solar-Energy | 137 | {96, 192, 336, 720} | (36601, 5161, 10417)  | 10min     | Energy      |

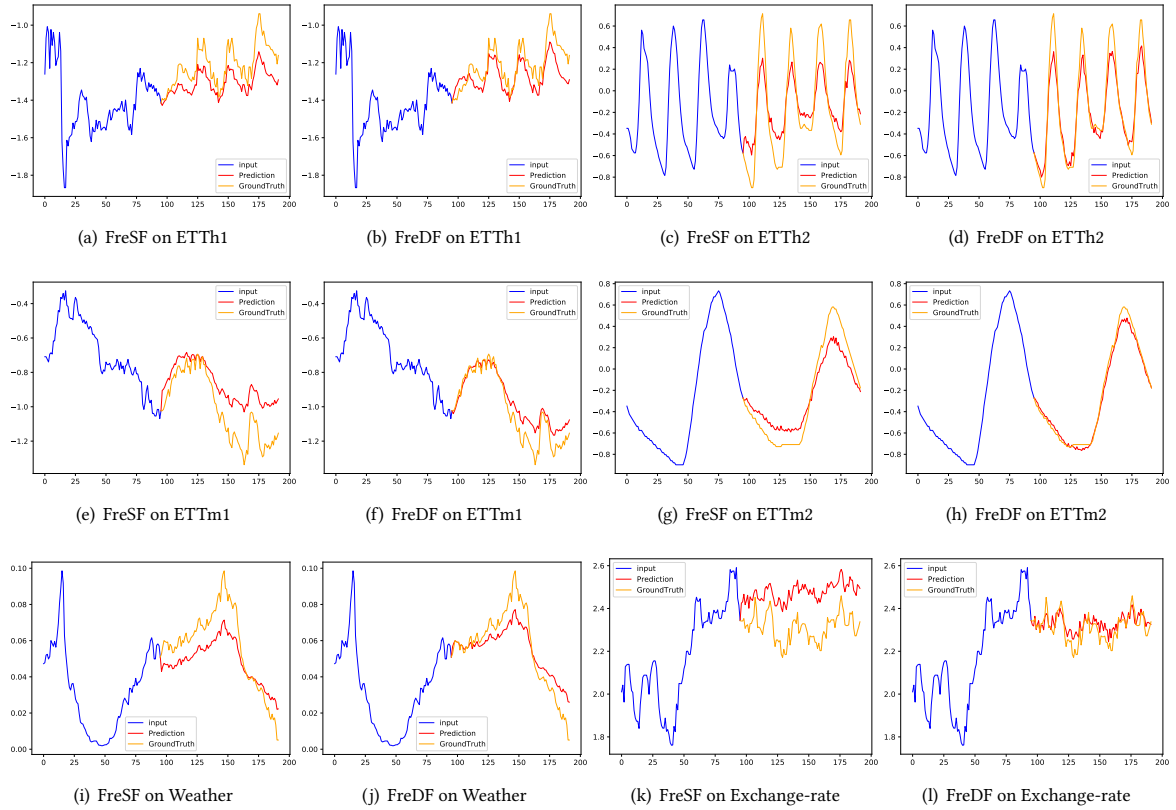

**Figure 1: Visualization comparing FreSF and FreDF.**

**Table 2: The comparison of prediction results using different frequencies on six datasets. The best Forecasting results in bold. The lower MSE/MAE indicates the more accurate prediction result.**

| Models   | W all frequency |        | W/O low-frequency |               | W/O mid-frequency |        | W/O high-frequency |               |
|----------|-----------------|--------|-------------------|---------------|-------------------|--------|--------------------|---------------|
| Metric   | MSE             | MAE    | MSE               | MAE           | MSE               | MAE    | MSE                | MAE           |
| ETTh1    | 0.0221          | 0.0954 | 0.0839            | 0.1827        | 0.0723            | 0.1683 | <b>0.0116</b>      | <b>0.0583</b> |
| ETTh2    | 0.0601          | 0.1544 | <b>0.0185</b>     | <b>0.0850</b> | 0.0852            | 0.1468 | 0.0511             | 0.1149        |
| ETTh1    | 0.0475          | 0.1352 | 0.1333            | 0.2351        | 0.0543            | 0.1432 | <b>0.0409</b>      | <b>0.1193</b> |
| ETTh2    | 0.5288          | 0.4734 | 0.2559            | 0.3178        | 0.1396            | 0.2217 | <b>0.1041</b>      | <b>0.1848</b> |
| Exchange | 0.0436          | 0.1218 | 0.0482            | 0.1292        | <b>0.0156</b>     | 0.0745 | 0.0157             | <b>0.0733</b> |
| Weather  | 0.0011          | 0.0217 | 0.0015            | 0.0207        | 0.0041            | 0.0379 | <b>0.0011</b>      | <b>0.0186</b> |

**Table 3: Ablation on the influence of operation sequence.**

| Methods                                               | Metric | Weather      |              |              |              | ECL          |              |              |              | Exchange-rate |              |              |              |
|-------------------------------------------------------|--------|--------------|--------------|--------------|--------------|--------------|--------------|--------------|--------------|---------------|--------------|--------------|--------------|
|                                                       |        | 96           | 192          | 336          | 720          | 96           | 192          | 336          | 720          | 96            | 192          | 336          | 720          |
| Dynamic Fusion on $Z^{l,m}$ (Our)                     | MSE    | <b>0.157</b> | <b>0.205</b> | <b>0.259</b> | <b>0.341</b> | <b>0.150</b> | <b>0.161</b> | <b>0.176</b> | <b>0.217</b> | <b>0.082</b>  | <b>0.172</b> | <b>0.316</b> | <b>0.835</b> |
|                                                       | MAE    | <b>0.208</b> | <b>0.246</b> | <b>0.287</b> | <b>0.339</b> | <b>0.242</b> | <b>0.253</b> | <b>0.268</b> | <b>0.311</b> | <b>0.199</b>  | <b>0.294</b> | <b>0.405</b> | <b>0.687</b> |
| Dynamic Fusion on spectrums $\mathcal{M}_{out}^{l,m}$ | MSE    | 0.161        | 0.209        | 0.262        | 0.345        | 0.154        | 0.163        | 0.176        | 0.221        | 0.083         | 0.174        | 0.318        | 0.839        |
|                                                       | MAE    | 0.214        | 0.253        | 0.292        | 0.347        | 0.242        | 0.253        | 0.270        | 0.313        | 0.199         | 0.295        | 0.406        | 0.670        |

**Table 4: Ablation on the number of FDBlock.**

| FDBlock |     | ETTh2        |              | ETTh2        |              | Weather      |              |
|---------|-----|--------------|--------------|--------------|--------------|--------------|--------------|
| Metric  |     | MSE          | MAE          | MSE          | MAE          | MSE          | MAE          |
| $L = 1$ | 96  | <b>0.292</b> | <b>0.341</b> | <b>0.175</b> | <b>0.257</b> | <b>0.157</b> | <b>0.208</b> |
|         | 192 | <b>0.376</b> | 0.391        | 0.242        | 0.300        | <b>0.205</b> | <b>0.246</b> |
|         | 336 | 0.419        | 0.428        | <b>0.303</b> | <b>0.341</b> | 0.260        | 0.287        |
|         | 720 | <b>0.420</b> | <b>0.439</b> | <b>0.405</b> | <b>0.396</b> | <b>0.341</b> | <b>0.339</b> |
| $L = 2$ | 96  | 0.295        | 0.342        | 0.176        | 0.257        | 0.157        | 0.209        |
|         | 192 | 0.377        | <b>0.390</b> | 0.241        | 0.300        | 0.206        | 0.246        |
|         | 336 | <b>0.415</b> | <b>0.426</b> | 0.304        | 0.343        | <b>0.259</b> | <b>0.287</b> |
|         | 720 | 0.422        | 0.440        | <b>0.406</b> | 0.398        | 0.342        | 0.339        |
| $L = 3$ | 96  | 0.293        | 0.341        | 0.176        | 0.258        | 0.158        | 0.208        |
|         | 192 | 0.378        | 0.394        | <b>0.241</b> | <b>0.299</b> | 0.207        | 0.248        |
|         | 336 | 0.416        | 0.426        | 0.304        | 0.345        | 0.262        | 0.289        |
|         | 720 | 0.421        | 0.440        | 0.407        | 0.397        | 0.343        | 0.340        |
